# Supplementary material for: The effect of the electric-field on the phase separation of semiconductor–insulator composite film
Source: Royal Society of Chemistry journal article supplement (doi:10.1039/c4cc06353h), 2014-11-10
Supplement: c4cc06353h1.pdf [file c4cc06353h1.pdf]

## Supporting information

### **The Effect of Electric-field on Phase Separation of Semiconductor/Insulator Composite Film**

Shiwei Wang, <sup>\*ab</sup> Zhuo Chen<sup>a</sup> and Yao Wang<sup>\*a</sup>

<sup>a</sup> Key Laboratory of Bio-Inspired Smart Interfacial Science and Technology of  
Ministry of Education, School of Chemistry and Environment, Beihang university,  
Beijing 100191, P R China,

<sup>b</sup> Changchun Institute of Applied Chemistry, Chinese Academy of Sciences,  
Changchun 130022, China

Correspondence author: E-mail: [wswjldx2004@163.com](mailto:wswjldx2004@163.com); [yao@buaa.edu.cn](mailto:yao@buaa.edu.cn)

## Experiment Methods

Regular poly(3-hexylthiophene) (P3HT) was synthesized according to the literature (J. Polym. Sci. Part A: Polym. Chem. 2012, 50, 2762.). Poly(methyl methacrylate) (PMMA) was purchased from J & K company ( $M_n=15000$  by GPC). The solvent of o-dichlorobenzene (ODCB) was purchased from Aldrich (chromatographic pure) and used as received. Sheet resistance of Indium tin oxide (ITO) glass was 30~40 ohm per square which can be received from Normal commercial channels.

The mixture solution of P3HT and PMMA (molar ratio 1:1) was dissolved in o-dichlorobenzene (ODCB) solvent, ensuring the solid content can be kept at 5%. Indium tin oxide (ITO) glass was etched by laser etching machine, the width of the channel was 200  $\mu\text{m}$ , and the depth was nearly 175 nm, which was just the thickness of ITO (as shown in Fig. S1), the P3HT/PMMA mixed solution was filled the channel by spin-coating (800 rpm, 1 min at room temperature), rapidly, 10 V DC electric field was added as shown as Fig. 1a in the text until the solvent evaporated completely.

Samples for atomic force microscopic (AFM) measurements were prepared by spin-coating (800 rpm, 1 min at room temperature) of P3HT/PMMA mixed solution as mentioned above, all of which whether the electric-field (EF) treatment or not were filmed by volatilization at room temperature. AFM images were acquired in tapping mode with a Digital Instruments Dimension 3100 Scanning Probe Microscope performed at room temperature in air using standard silicon cantilevers with a nominal spring constant of 50  $\text{N m}^{-1}$  and resonance frequency of ~300 kHz. The images were acquired at a scan frequency of 1 Hz in  $5 \times 5 \mu\text{m}^2$  scan areas.

Polarizing optical microscopic observations were carried out with an E600POL polarizing optical microscope (Nikon, Tokyo, Japan) equipped with a DS-5 M CCD camera (Nikon) connected to a DS-L1 control unit (Nikon).

## Table of Contents

**Figure S1.** The ITO glass etched by laser etching machine.

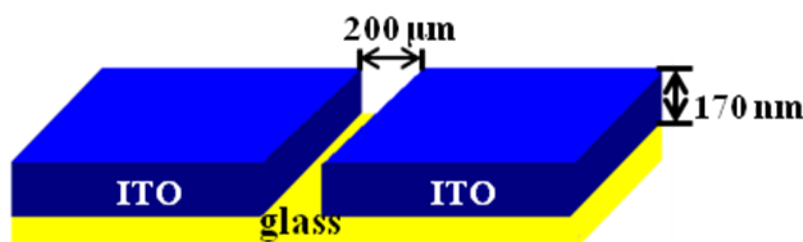

**Figure S1.** The ITO glass etched by laser etching machine.
